# Acquisition of Multidrug-Resistant *Pseudomonas aeruginosa* in Patients in Intensive Care Units: Role of Antibiotics with Antipseudomonal Activity

Elisabeth Paramythiotou<sup>1,a</sup>, Jean-Christophe Lucet,<sup>2</sup> Jean-François Timsit,<sup>3,6</sup> Dominique Vanjak,<sup>1</sup> Catherine Paugam-Burtz,<sup>4</sup> Jean-Louis Trouillet,<sup>5</sup> Stéphanie Belloc,<sup>1</sup> Najiby Kassis,<sup>1</sup> Andreas Karabinis,<sup>7</sup> and Antoine Andremont<sup>1</sup>

<sup>1</sup>Bacteriology Laboratory, <sup>2</sup>Infection Control Unit, <sup>3</sup>Infectious Diseases Intensive Care Unit, <sup>4</sup>Surgical Intensive Care Unit, and <sup>5</sup>Medical Intensive Care Unit, Bichat-Claude Bernard Hospital, and <sup>6</sup>Department of Biostatistics, Institut National de la Santé et de la Recherche Médicale, U444, Saint-Louis Hospital, Paris, France; and <sup>7</sup>Intensive Care Unit, George Gennimatas Hospital, Athens, Greece

A matched case-control study was performed to identify risk factors for acquiring multidrug-resistant *Pseudomonas aeruginosa* (MDRPA) in intensive care unit (ICU) patients during a 2-year period. MDRPA was defined as *P. aeruginosa* with combined decreased susceptibility to piperacillin, ceftazidime, imipenem, and ciprofloxacin. Thirty-seven patients who were colonized or infected with MDRPA were identified, 34 of whom were matched with 34 control patients who had cultures that showed no growth of *P. aeruginosa*. Matching criteria were severity of illness and length of ICU stay, with each control patient staying in the ICU for at least as long as the time period between the corresponding case patient's admission to the ICU and the acquisition of MDRPA. Baseline demographic and clinical characteristics and the use of invasive procedures were similar for case patients and control patients. Multivariate analysis identified duration of ciprofloxacin treatment as an independent risk factor for MDRPA acquisition, whereas the duration of treatment with imipenem was of borderline significance. These data support a major role for the use of antibiotics with high antipseudomonal activity, particularly ciprofloxacin, in the emergence of MDRPA.

Antibiotic resistance is a major concern of contemporary medicine. The ongoing emergence of resistant strains that cause nosocomial infections contributes substantially to the morbidity and mortality of hospitalized patients [1, 2]. Bacteria from intensive care units (ICUs) have the highest proportion of resistance [3, 4]. During

the past decade, infecting strains that are resistant to several (or even most) available antibiotics have emerged, causing major therapeutic problems [2, 5].

*Pseudomonas aeruginosa* is one of the main organisms responsible for drug-resistant nosocomial infections and is a leading cause of bacteremia and nosocomial pneumonia [6–9]. In addition to being intrinsically resistant to several antimicrobial agents, *P. aeruginosa* often acquires mechanisms of resistance to other antibiotics. Previous treatment with antibiotics that are characterized by high antipseudomonal activity [10–15] and prolonged antibiotic treatment [16] are both recognized risk factors for the emergence of drug-resistant *P. aeruginosa*. Acquisition of strains resistant to ceftazidime, imipenem, piperacillin, or ciprofloxacin is associated with significantly longer hospital stays and an increased rate of secondary bacteremia in patients with *P. aeruginosa* infection [17].

*P. aeruginosa* strains can acquire resistance to mul-

Received 12 August 2003; accepted 31 October 2003; electronically published 17 February 2004.

Financial support: Supported in part by the Programme de Recherches Fondamentales en Microbiologie et Maladies Infectieuses et Parasitaires 2000, Ministère de la Recherche, France (grant 504653).

<sup>a</sup>Present affiliation: Intensive Care Unit, George Gennimatas Hospital, Athens, Greece.

Reprints or correspondence: Dr. Jean-Christophe Lucet, Unité d'Hygiène et de Lutte contre l'Infection Nosocomiale, GH Bichat-Claude Bernard, 75877 Paris Cedex 18, France (jean-christophe.lucet@bch.ap-hop-paris.fr).

**Clinical Infectious Diseases** 2004;38:670–7

© 2004 by the Infectious Diseases Society of America. All rights reserved. 1058-4838/2004/3805-0010\$15.00

tipl (or even all) antibiotics. Multidrug-resistant *P. aeruginosa* (MDRPA) strains were first reported in patients with cystic fibrosis [18]. Outbreaks due to single strains have been reported [19, 20]; however, in other instances, outbreaks have been reported in which the strains varied among patients [21, 22]. The global disease burden associated with *P. aeruginosa* strains that are resistant to all antipseudomonal drugs and the specific risk factors for acquisition of these strains have not been described. Here, we report the results of an epidemiological study of the incidence of and risk factors for infection or colonization with MDRPA strains in 3 ICUs in a large teaching hospital.

## PATIENTS AND METHODS

The Bichat–Claude Bernard hospital is a 1100-bed teaching hospital in Paris, France, with >30,000 hospitalizations of >24-h duration each year. There are 5 ICUs in the hospital, including an 18-bed infectious diseases ICU (IDICU), a 17-bed medical ICU (MICU), and a 12-bed surgical ICU (SICU). The total annual number of admissions to these 3 ICUs is ~1300.

**Selection of case and control patients.** The computerized database of the hospital's bacteriology laboratory was used to identify all cultures obtained from patients hospitalized during 1999 and 2000 that grew strains of multidrug-resistant *P. aeruginosa*. Multidrug resistance was defined as combined resistance or intermediate susceptibility to piperacillin, ceftazidime, imipenem, and ciprofloxacin. Resistance to aminoglycosides was not included in the definition, because these agents are not used as first-line single-drug therapy for *P. aeruginosa* infection, but, rather, in combination with 1 of the 4 antibiotics listed above.

Routine screening for *P. aeruginosa* carriage was not performed during the study period. Thus, all MDRPA strains were isolated from clinical specimens. Immediately after isolation, all MDRPA strains were stored frozen in stock cultures. These cultures were used to confirm identification of the strains by classic identification methods and to test the antibiotic susceptibility of the strains with use of the disk diffusion technique, as recommended by the Antibiotic Susceptibility Testing Committee of the French Society for Microbiology [23]. Susceptibility thresholds for defining resistance were as follows:  $\leq 16$  mg/L, for piperacillin;  $\leq 4$  mg/L, for ceftazidime;  $\leq 4$  mg/L, for imipenem; and  $\leq 1$  mg/L, for ciprofloxacin. In comparison, NCCLS susceptibility thresholds for defining resistance are as follows:  $\leq 64$  mg/L, for piperacillin;  $\leq 8$  mg/L, for ceftazidime;  $\leq 4$  mg/L, for imipenem; and  $\leq 1$  mg/L, for ciprofloxacin.

A matched case-control study was performed to determine factors associated with MDRPA acquisition. A case patient was defined as a patient hospitalized in 1 of the 3 study ICUs during the study period with a clinical culture that grew a newly identified MDRPA strain >48 h after admission to and <48 h after

discharge from the ICU (such patients presumably acquired MDRPA in the ICU). Clinical and microbiological charts of patients with MDRPA were reviewed and patients were classified according to Centers for Disease Control and Prevention (CDC) criteria (slightly modified to account for quantitative microbiological results) as either "infected" or "colonized" [24]. A control patient was defined as a patient who was hospitalized in the same ICU as the corresponding case patient during the study period but whose microbiological cultures for *P. aeruginosa* showed no growth at any time during their ICU stay. For the case patients, the period between admission to the ICU and the first culture positive for MDRPA was defined as the risk exposure time. For each matched control patient, length of stay in the ICU was at least as long as the risk exposure time for the corresponding case patient. In addition, control patients were matched with corresponding case patients on the basis of Simplified Acute Physiology Score II (SAPS II; matched for score  $\pm 2$ ) at ICU admission [25]. If >1 appropriate control patient was available for a particular case patient, the control patient whose ICU admission date was closest to that of the case patient was selected.

**Data collection.** Age, sex, reason for ICU admission, history of immunosuppression, and severity of underlying disease (as defined by the McCabe and Jackson scales [26] and the chronic health evaluation score [27]) were recorded at ICU admission. Severity of illness at ICU admission and at 4 days before MDRPA acquisition (for the case patients) or the equivalent time point (for control patients) was assessed using the Organ System Failure (OSF) score [28] and the SAPS II.

For all case and control patients, the following were recorded: nature and duration of invasive procedures used during the risk exposure time, nature and duration of use of all antimicrobials given in the ICU for  $\geq 48$  h, length of ICU and hospital stays, and mortality. Because of the retrospective design of the study, it was not possible to investigate antibiotics given to a patient before admission to the ICU.

**Statistical analysis.** Bivariate and multivariate analyses were conducted. In the bivariate analysis, continuous variables were compared using the nonparametric Wilcoxon rank-sum test for paired data. Because the log-linearity assumption was not verified for all durations of antibiotic therapy, these variables were then categorized. For antimicrobials given to <17 patients (25% of the total study population), case and control patients who received each agent were compared with those who did not. For antimicrobials given to >17 patients, the following 3 categories, based on the median percentage of the risk exposure time during which the antimicrobial was given, were created: no therapy with the antimicrobial, duration of therapy less than the median, or duration of therapy greater than the median (calculation of the median percentage of risk

exposure time during which the antimicrobial was given included only patients who received the agent).

Categorical variables were subjected to bivariate analysis using conditional logistic regression (Proc Genmod) to take into account the variations in risk exposure time among pairs. Next, we performed a multivariate analysis on the variables found to be significant in the bivariate analysis ( $P < .10$ ). A forward selection process was used. All tests were 2-tailed, and  $P$  values  $< .05$  were considered to be significant. Statistical analyses were performed using EpiInfo, version 6.0 (CDC) and SAS, version 8.0 (SAS Institute). Results are expressed as mean values ( $\pm$  SD), unless otherwise indicated.

## RESULTS

During the study period, 2613 patients were hospitalized in the 3 ICUs, and *P. aeruginosa* was recovered from 370 (14.1%) of these patients. Among these 370 patients, prevalence of infection or colonization with strains of *P. aeruginosa* resistant to each of the antibiotics (counting only 1 isolate per patient) was as follows: 21.9% for ceftazidime, 23.5% for imipenem, 30.2% for ciprofloxacin, and 55.9% for piperacillin (administered alone or in combination with tazobactam). Among the patients with *P. aeruginosa*, the prevalence of MDRPA infection or colonization was 10.5% (39 of 370 patients). In 16 (41%) of these 39 patients, the isolates were also resistant to all aminoglycosides (i.e., gentamicin, tobramycin, streptomycin, netilmicin, amikacin, and isepamycin).

Of the 39 MDRPA-positive patients, 2 had cultures positive for MDRPA within the first 2 days after admission to the ICU and were excluded from further analysis. The 37 remaining patients were the case patients for the present study. Eighteen (49%) were in the SICU, 11 (30%) were in the MICU, and 8 (22%) were in the IDICU. Nearly one-half of the patients came from either the cardiac surgery department (24%) or the emergency department (24%) of the hospital. Reasons for admission to the ICU were acute respiratory failure for 13 (35%) of the patients, septic shock or multi-organ failure for 8 (22%), intraabdominal sepsis for 6 (16%); cardiovascular disease for 6 (16%), neurological disease for 2 (5%), and trauma for 2 (5%).

The temporal-spatial epidemiological analysis showed no evidence of patient-to-patient transmission of MDRPA. For 13 (35%) of the MDRPA-positive patients, MDRPA was the first *P. aeruginosa* strain isolated. For 10 other MDRPA-positive patients (27%), a *P. aeruginosa* strain that was fully susceptible to the 4 antibiotics included in the definition of multidrug resistance had been isolated previously during the hospital stay. For the remaining 14 patients, the first *P. aeruginosa* strain isolated in our hospital (before the MDRPA strain was isolated) was susceptible to 3, 2, or 1 of the antibiotics used to define

MDRPA (in 3 [8%], 6 [16%], and 5 [14%] of the patients, respectively).

Of these 37 patients, 25 were men and 12 were women, with an age of  $57 \pm 17$  years (median, 63 years). Immunodepression was present in 9 (24%) of the patients. Primary sites from which MDRPA was recovered were the respiratory system (20 patients [54%]), a catheter (7 [19%]), urine samples (6 [16%]), blood samples (4 [11%]), and the abdomen (3 [8%]). Twenty-six (70%) of the MDRPA-positive patients were infected and 11 (30%) were colonized. At admission, the SAPS II was  $43 \pm 17$  (median, 38) and the APACHE II score was  $18 \pm 8$  (median, 16). Time from ICU admission to MDRPA recovery was  $29.5 \pm 14.3$  days (median, 26 days), with a range of 3–140 days. Duration of stay in the ICU was  $72 \pm 69$  days (median, 38 days). The ICU mortality rate was 43%.

For 3 case patients with prolonged ICU stays prior to their first MDRPA-positive culture (stays of 40, 81, and 140 days, respectively), no control patients with similarly long risk exposure times were available. These 3 case patients were excluded from the study. For the 34 case-control pairs left for the study, the duration of risk exposure time was  $25.0 \pm 15.9$  days (median, 26 days; range, 3–63 days). For the case patients, the duration of ICU stay was  $57.0 \pm 37.3$  days (median, 44.5 days), and the ICU mortality rate was 44%.

Baseline demographic and clinical characteristics, underlying disease scores, severity of illness scores at ICU admission and at 4 days before MDRPA acquisition (for the case patients) or at the equivalent time point (for the control patients), use and duration of invasive procedures, and ICU and hospital mortality rates are presented in table 1. No significant differences were found between case patients and control patients, except that hemodiafiltration or hemodialysis was performed significantly more often in the case patient group.

Results of the analysis of the receipt of specific antibiotics are presented in table 2. In the bivariate analysis, receipt of piperacillin (or ticarcillin) or metronidazole for any duration and receipt of imipenem or ciprofloxacin for durations longer than the median were significantly associated with MDRPA acquisition.

The total duration of treatment with antimicrobials that have general activity against gram-negative bacteria (i.e., all  $\beta$ -lactams, fluoroquinolones, trimethoprim-sulfamethoxazole, and aminoglycosides) was not significantly different between the case patients and the control patients ( $24.3 \pm 18.7$  days [median, 23.0 days] vs.  $20.4 \pm 16.0$  days [median, 14.5 days], for control patients;  $P = .5$ ). In contrast, case patients received antibiotics with specific antipseudomonal activity (i.e., ceftazidime, imipenem, ciprofloxacin, and broad-spectrum penicillins) for a significantly longer duration than did control patients (mean duration,  $16.1 \pm 15.8$  days [median, 13.0 days] vs.  $5.3 \pm 9.4$  days [median, 2.0 days];  $P = .001$ ). The control pa-

**Table 1. Demographic and clinical characteristics of 34 case patients infected or colonized with multidrug-resistant *Pseudomonas aeruginosa* (MDRPA) and 34 matched control patients hospitalized in intensive care units.**

| Variable                                                    | Case patients<br>(n = 34) | Control patients<br>(n = 34) | P <sup>a</sup> |
|-------------------------------------------------------------|---------------------------|------------------------------|----------------|
| Age, years                                                  | 59.0 ± 17.6 (64.6)        | 61.5 ± 17.3 (61.5)           | .48            |
| Male sex                                                    | 22 (65)                   | 22 (65)                      | 1              |
| Duration of hospitalization prior to ICU admission, days    | 6.6 ± 11.1 (1)            | 3.9 ± 7.2 (1)                | .43            |
| No hospitalization prior to ICU admission                   | 8 (24)                    | 4 (12)                       | .21            |
| Presence of immunosuppression                               | 9 (26)                    | 8 (24)                       | .78            |
| Severity of illness score at ICU admission                  |                           |                              |                |
| SAPS II score                                               | 43.8 ± 17.2 (39.5)        | 41.2 ± 13.9 (37.5)           | .58            |
| APACHE II score                                             | 18.6 ± 7.7 (16)           | 17.4 ± 7.0 (16)              | .56            |
| OSF score >1                                                | 22 (65)                   | 24 (71)                      | .60            |
| Ultimately or rapidly fatal disease <sup>b</sup>            | 25 (74)                   | 19 (56)                      | .13            |
| Chronic health failure score >2                             | 7 (21)                    | 14 (41)                      | .08            |
| Severity of illness score 4 days prior to MDRPA acquisition |                           |                              |                |
| SAPS II score                                               | 37.3 ± 16.0 (38)          | 35.4 ± 13.2 (33)             | .70            |
| APACHE II score                                             | 17.0 ± 13.8 (13)          | 13.7 ± 6.1 (14)              | .66            |
| OSF score >1                                                | 17 (50)                   | 16 (47)                      | .8             |
| Clinical intervention                                       |                           |                              |                |
| Ventilatory support                                         |                           |                              |                |
| Use                                                         | 33 (97)                   | 33 (97)                      | 1              |
| Duration, days                                              | 21.6 ± 16.8 (19)          | 23.4 ± 16.3 (20.5)           | .62            |
| Urinary catheter                                            |                           |                              |                |
| Use                                                         | 33 (97)                   | 34 (100)                     | 1              |
| Duration, days                                              | 23.6 ± 16.1 (23.5)        | 24.5 ± 15.7 (26)             | .83            |
| Central venous catheter                                     |                           |                              |                |
| Use                                                         | 32 (94)                   | 31 (91)                      | 1              |
| Duration, days                                              | 18.5 ± 14.9 (14.5)        | 17.8 ± 14.2 (14.0)           | .86            |
| Arterial catheter                                           |                           |                              |                |
| Use                                                         | 31 (91)                   | 30 (88)                      | 1              |
| Duration, days                                              | 14.4 ± 13.0 (10.5)        | 14.6 ± 13.1 (10.5)           | .92            |
| Hemodiafiltration or hemodialysis                           |                           |                              |                |
| Use                                                         | 15 (44)                   | 7 (21)                       | .04            |
| Duration, days                                              | 4.2 ± 9.9 (0)             | 2.9 ± 7.8 (0)                | .19            |
| Pulmonary artery catheter                                   |                           |                              |                |
| Use                                                         | 6 (18)                    | 12 (35)                      | .10            |
| Duration, days                                              | 0.8 ± 2.9 (0)             | 0.7 ± 1.4 (0)                | .18            |
| Length of ICU stay, days                                    | 57.0 ± 37.3 (44.5)        | 46.9 ± 22.5 (43.5)           | .55            |
| Length of hospitalization after ICU discharge, days         | 11.1 ± 18.6 (0)           | 5.8 ± 10.4 (0)               | .28            |
| ICU mortality                                               | 15 (44)                   | 16 (47)                      | .81            |
| Hospital mortality                                          | 16 (47)                   | 17 (50)                      | .8             |

**NOTE.** Data are either no. (%) of patients or mean value ± SD (median). Duration of a procedure was set at 0 if the procedure was absent. APACHE, Acute Physiology and Chronic Health Evaluation; ICU, intensive care unit; OSF, Organ System Failure; SAPS, Simplified Acute Physiology Score.

<sup>a</sup> Bivariate analysis, according to conditional logistic regression, or Wilcoxon rank sum test for paired data, as appropriate.

<sup>b</sup> Severity of underlying disease defined by the McCabe and Jackson scales [26].

**Table 2. Receipt of antimicrobial agents in 34 case patients infected or colonized with multidrug-resistant *Pseudomonas aeruginosa* and 34 matched control patients hospitalized in intensive care units.**

| Antimicrobial agent(s) received                  | No. (%) of patients, by study group |                  | P <sup>a</sup> |
|--------------------------------------------------|-------------------------------------|------------------|----------------|
|                                                  | Case (n = 34)                       | Control (n = 34) |                |
| Third-generation cephalosporins                  |                                     |                  |                |
| For any duration                                 | 12 (35)                             | 15 (44)          | .46            |
| For duration longer than the median <sup>b</sup> | 5 (15)                              | 10 (29)          | .15            |
| Ceftazidime                                      | 7 (21)                              | 2 (6)            | .15            |
| Piperacillin or ticarcillin                      | 7 (21)                              | 0 (0)            | .01            |
| Piperacillin-tazobactam                          | 7 (21)                              | 4 (12)           | .32            |
| Imipenem                                         |                                     |                  |                |
| For any duration                                 | 21 (62)                             | 15 (44)          | .14            |
| For duration longer than the median <sup>b</sup> | 14 (41)                             | 5 (15)           | .02            |
| Ciprofloxacin                                    |                                     |                  |                |
| For any duration                                 | 13 (38)                             | 8 (24)           | .19            |
| For duration longer than the median <sup>b</sup> | 10 (29)                             | 1 (3)            | .01            |
| Other fluoroquinolones                           | 4 (12)                              | 9 (27)           | .12            |
| Aminoglycosides                                  |                                     |                  |                |
| For any duration                                 | 14 (41)                             | 20 (59)          | .15            |
| For duration longer than the median <sup>b</sup> | 7 (21)                              | 12 (35)          | .18            |
| Glycopeptides                                    |                                     |                  |                |
| For any duration                                 | 21 (62)                             | 19 (60)          | .62            |
| For duration longer than the median <sup>b</sup> | 12 (35)                             | 8 (23)           | .28            |
| Metronidazoles                                   | 11 (32)                             | 4 (12)           | .04            |

<sup>a</sup> Obtained using bivariate analysis, according to the conditional logistic regression analysis.

<sup>b</sup> Median percentage of risk exposure time during which the antimicrobial was given for all patients who received that agent. The median percentage of risk exposure time for those patients receiving third-generation cephalosporins was 27%; for those receiving imipenem, 29%; for those receiving ciprofloxacin, 34%; for those receiving aminoglycoside, 15%; for those receiving glycopeptides, 32%.

tients received antibiotics without antipseudomonal activity more often than did the case patients (28 [82%] vs. 19 [56%];  $P = .018$ ) and for a longer duration ( $12.4 \pm 11.9$  days [median, 8.0 days] vs.  $4.9 \pm 6.7$  days [median, 2.5 days];  $P = .002$ ). Among case patients, the number of antibiotics active against *P. aeruginosa* that were received during the risk exposure time was as follows: 0, in 8 (24%); 1, in 7 (21%); 2, in 12 (35%); and 3, in 7 (21%). Corresponding figures among the control patients were as follows: 0, in 14 (41%); 1, in 11 (32%); and 2, in 9 (26%); none of the control patients received  $\geq 3$  of these antimicrobials.

Results of the multivariate analysis are reported in table 3. In the final model, only duration of ciprofloxacin therapy was significantly associated with MDRPA acquisition (OR, 11.0; 95% CI, 1.27–32.9;  $P = .03$ ). A trend was observed for duration of imipenem therapy (OR, 3.17; 95% CI, 0.92–10.9;  $P = .07$ ).

## DISCUSSION

The prevalence of antimicrobial-resistant *P. aeruginosa* is increasing among ICU patients. Data from the National Nosocomial Infection Surveillance system show that, in 2000, the prevalence of resistant *P. aeruginosa* increased to 17.7% for imipenem, 27.3% for quinolones, and 26.4% for third-generation cephalosporins [4]. In European ICUs, the prevalence of *P. aeruginosa* with decreased susceptibility to imipenem, ceftazidime, piperacillin, and ciprofloxacin ranged from 16%–24% for imipenem, 2%–16% for ceftazidime, 5%–26% for piperacillin, and 8%–37% for ciprofloxacin [29].

Data on MDRPA with decreased susceptibility to all 4 major antipseudomonal antibiotics are scarce, however. Most such data derive from investigations of outbreaks attributable to a single strain originating from the environment [19] and/or transmitted from patient to patient [20]. Among studies that did not investigate outbreaks, a study conducted in a 320-bed referral hospital identified 22 patients with MDRPA over a 3.5-year period [22]. In a study in Brazil, 15 patients had infections due to MDRPA in a 2000-bed hospital over a 5-month period [30]. In a multicenter study, multidrug resistance (defined as combined resistance to piperacillin, ceftazidime, imipenem, and gentamicin) was observed in only 3% of *P. aeruginosa* strains [6]. In another recent study, decreased susceptibility to imipenem was found in 23.8% of *P. aeruginosa* isolates. Of those isolates with decreased susceptibility to imipenem, 40% were not susceptible to ceftazidime, and 72% were not susceptible to ciprofloxacin [31].

We found 39 patients with an MDRPA strain who were hospitalized in the study ICUs during a 2-year period. The large number of patients found in our study, compared with the number of patients in other studies, may be related, in part, to the breakpoints we used to define resistance of *P. aeruginosa* to antipseudomonal drugs. These breakpoints were lower than the NCCLS breakpoints, which were used in most published studies. The long duration of stay in the ICU for our patients (a mean of 9.9–14 days, depending on the ICU and the year) may also have contributed to the high rate of MDRPA acquisition.

As expected, the time to MDRPA acquisition was long, with a mean of 29 days between ICU admission and MDRPA acquisition. This is in accordance with the 23-day mean reported in another study [22]. Furthermore, *P. aeruginosa* strains with greater antibiotic susceptibility than the MDRPA strains were recovered from 65% of our patients before the MDRPA strains were recovered (including 10 patients [27%] from whom fully susceptible strains were recovered). In the present study, susceptible and resistant *P. aeruginosa* strains from a given patient were not compared using molecular techniques. It has been shown, however, that resistance mechanisms can accumulate

**Table 3. Multivariate analysis of risk factors associated with infection or colonization with multidrug-resistant *Pseudomonas aeruginosa* (MDRPA) among patients hospitalized in intensive care units.**

| Variable                                                                  | OR (95% CI)      |                  |
|---------------------------------------------------------------------------|------------------|------------------|
|                                                                           | Initial model    | Final model      |
| Receipt of hemodiafiltration or hemodialysis                              | 3.05 (1.03–10.4) | ...              |
| Receipt of piperacillin or ticarcillin                                    | 4.13 (0.78–21.8) | ...              |
| Receipt of imipenem for duration longer than the median <sup>a</sup>      | 4.05 (1.26–13.1) | 3.17 (0.92–10.9) |
| Receipt of ciprofloxacin for duration longer than the median <sup>a</sup> | 53.7 (2.94–114)  | 11.0 (1.27–32.9) |
| Receipt of metronidazole                                                  | 3.56 (1.01–12.7) | ...              |

**NOTE.** Multivariate analysis was performed using conditional logistic regression with a forward selection process to identify variables independently associated with MDRPA acquisition.

<sup>a</sup> Median percentage of risk exposure time during which the antimicrobial was given for all patients who received that agent. The median percentage of risk exposure time for those patients receiving imipenem was 29%; for those receiving ciprofloxacin, 34%.

gradually in initially susceptible *P. aeruginosa* strains in treated patients [22, 32].

For the risk factor analysis, we paid careful attention to selection of the control patients. First, we selected the potential control patients from among those patients who tested negative for *P. aeruginosa*. It has been established that studies evaluating the role of antimicrobials as risk factors for isolation of a resistant organism should include control patients who do not have cultures positive for antimicrobial-susceptible strains of that organism [33, 34]. Second, we selected control patients whose risk exposure time was at least as long as that of the matched case patient. Although multivariate modeling can adjust for the risk exposure time, other variables, such as use of invasive devices in the ICU, usually show collinearity with the risk exposure time. It is unclear whether adjusting risk exposure time in a multivariate model controls for these other variables [33]. By including the risk exposure time among the matching criteria, we adjusted for one of the most important risk factors for acquisition of multidrug-resistant bacteria [35].

Third, most previous studies investigating the impact of previous antibiotic exposure on the acquisition of resistant *P. aeruginosa* strains included only receipt of antibiotics (usually for >48 h), and few explored the impact of treatment duration [16]. Several studies suggest that not only receipt but also duration of antimicrobial therapy should be taken into consideration [36].

One important finding of our study is that invasive procedures and severity score changes during the ICU stay were not significant risk factors for MDRPA acquisition, in contrast to the findings of other studies [35, 37]. Again, differences in matching criteria probably explain why our findings differ from those of other studies.

The similarities between case and control patients, both in terms of their baseline characteristics and in the use and du-

ration of invasive procedures, strengthen the validity of the differences in antibiotic therapy observed in our study. Overall, there was no difference between case and control patients in receipt of antibiotics, with each group receiving antibiotics active against gram-negative rods for a similar mean duration. When antibiotics with and without activity against wild type strains of *P. aeruginosa* were analyzed separately, major differences were found, including, in control patients, significantly more-common and longer durations of treatment with antibiotics with little antipseudomonal activity and, in case patients, significantly longer durations of treatment with antibiotics with full antipseudomonal activity. This clearly suggests that, if treatment with an antibiotic active against gram-negative bacteria is needed, agents with little antipseudomonal activity should be preferred over those with specific antipseudomonal activity to limit the emergence of MDRPA.

When investigating the role of each antibiotic individually, only the duration of ciprofloxacin therapy and, to a lesser extent, of imipenem therapy were associated with MDRPA acquisition. Another study suggested that receipt of any fluoroquinolone may be a risk factor for acquiring piperacillin-resistant *P. aeruginosa* [37]. In our study, receipt of ciprofloxacin was a critical risk factor, whereas receipt of quinolones without activity against *P. aeruginosa* conferred protection against the emergence of MDRPA. That receipt of imipenem therapy was close to being a statistically significant risk factor for MDRPA acquisition is consistent with the role of imipenem therapy as a risk factor for the emergence of imipenem-resistant *P. aeruginosa*, as reported in at least 3 studies [10, 11, 13]. Given the fairly small number of patients, our study may have lacked statistical power for detecting the risk factor effects of additional antibiotics.

Our study has several limitations. First, active surveillance cultures were not done to screen for *P. aeruginosa*. Had such

cultures been performed, case patients would probably have been identified earlier, some control patients would probably have been identified as case patients, and others would probably have been excluded from the study after having cultures positive for susceptible strains of *P. aeruginosa*. Second, we did not collect data on whether the patients had a history of antibiotic exposure before ICU admission. Third, we cannot exclude the possibility of patient-to-patient transmission of MDRPA strains. However, MDRPA was usually identified after a long stay in the ICU, and we found no evidence of temporal-spatial clustering of cases of MDRPA. Furthermore, if patient-to-patient transmission did occur, this would have weakened the association between MDRPA acquisition and receipt of antibiotics. Finally, we cannot conclude there was a causal association between receipt of ciprofloxacin therapy and acquisition of MDRPA, because of the small set of patients and possible colinearity between exposures to antibiotics.

In conclusion, our data support a major role for antibiotics with specific antipseudomonal activity (most notably, ciprofloxacin) in the emergence of MDRPA. The use and/or duration of treatment with these antibiotics should be restricted as part of efforts to control the emergence of MDRPA in ICUs.

## References

- Acar JF. Consequences of bacterial resistance to antibiotics in medical practice. *Clin Infect Dis* **1997**;24 (Suppl 1):S17–8.
- Goldmann DA, Weinstein RA, Wenzel RP, et al. Strategies to prevent and control the emergence and spread of antimicrobial-resistant microorganisms in hospitals: a challenge to hospital leadership. *JAMA* **1996**;275:234–40.
- Fridkin SK, Steward CD, Edwards JR, et al. Surveillance of antimicrobial use and antimicrobial resistance in United States hospitals: project ICARE phase 2: Project Intensive Care Antimicrobial Resistance Epidemiology (ICARE) hospitals. *Clin Infect Dis* **1999**;29:245–52.
- Centers for Disease Control and Prevention. National nosocomial infections surveillance (NNIS) system report, data summary from January 1992–June 2001, issued August 2001. *Am J Infect Control* **2001**;29:404–21.
- Dennesen PJ, Bonten MJ, Weinstein RA. Multiresistant bacteria as a hospital epidemic problem. *Ann Med* **1998**;30:176–85.
- Gales AC, Jones RN, Turnidge J, Rennie R, Ramphal R. Characterization of *Pseudomonas aeruginosa* isolates: occurrence rates, antimicrobial susceptibility patterns, and molecular typing in the global SENTRY Antimicrobial Surveillance Program, 1997–1999. *Clin Infect Dis* **2001**;32 (Suppl 2):S146–55.
- Jones RN, Croco MA, Kugler KC, Pfaller MA, Beach ML. Respiratory tract pathogens isolated from patients hospitalized with suspected pneumonia: frequency of occurrence and antimicrobial susceptibility patterns from the SENTRY Antimicrobial Surveillance Program (United States and Canada, 1997). *Diagn Microbiol Infect Dis* **2000**;37:115–25.
- Spencer RC. Predominant pathogens found in the European Prevalence of Infection in Intensive Care Study. *Eur J Clin Microbiol Infect Dis* **1996**;15:281–5.
- Vincent JL. Microbial resistance: lessons from the EPIC study. *European Prevalence of Infection. Intensive Care Med* **2000**;26 (Suppl 1):S3–8.
- Troillet N, Samore MH, Carmeli Y. Imipenem-resistant *Pseudomonas aeruginosa*: risk factors and antibiotic susceptibility patterns. *Clin Infect Dis* **1997**;25:1094–8.
- Carmeli Y, Troillet N, Eliopoulos GM, Samore MH. Emergence of antibiotic-resistant *Pseudomonas aeruginosa*: comparison of risks associated with different antipseudomonal agents. *Antimicrob Agents Chemother* **1999**;43:1379–82.
- Harris AD, Perencevich E, Roghmann MC, Morris G, Kaye KS, Johnson JA. Risk factors for piperacillin-tazobactam-resistant *Pseudomonas aeruginosa* among hospitalized patients. *Antimicrob Agents Chemother* **2002**;46:854–8.
- Harris AD, Smith D, Johnson JA, Bradham DD, Roghmann MC. Risk factors for imipenem-resistant *Pseudomonas aeruginosa* among hospitalized patients. *Clin Infect Dis* **2002**;34:340–5.
- Lee SC, Fung CP, Liu PY, et al. Nosocomial infections with ceftazidime-resistant *Pseudomonas aeruginosa*: risk factors and outcome. *Infect Control Hosp Epidemiol* **1999**;20:205–7.
- El Amari EB, Chamot E, Auckenthaler R, Pechere JC, Van Delden C. Influence of previous exposure to antibiotic therapy on the susceptibility pattern of *Pseudomonas aeruginosa* bacteremic isolates. *Clin Infect Dis* **2001**;33:1859–64.
- Philippe E, Weiss M, Shultz JM, Yeomans F, Ehrenkranz NJ. Emergence of highly antibiotic-resistant *Pseudomonas aeruginosa* in relation to duration of empirical antipseudomonal antibiotic treatment. *Clin Perform Qual Health Care* **1999**;7:83–7.
- Carmeli Y, Troillet N, Karchmer AW, Samore MH. Health and economic outcomes of antibiotic resistance in *Pseudomonas aeruginosa*. *Arch Intern Med* **1999**;159:1127–32.
- Aris RM, Gilligan PH, Neuringer IP, Gott KK, Rea J, Yankaskas JR. The effects of panresistant bacteria in cystic fibrosis patients on lung transplant outcome. *Am J Respir Crit Care Med* **1997**;155:1699–704.
- Bert F, Maubec E, Bruneau B, Berry P, Lambert-Zechovsky N. Multi-resistant *Pseudomonas aeruginosa* outbreak associated with contaminated tap water in a neurosurgery intensive care unit. *J Hosp Infect* **1998**;39:53–62.
- Pitten FA, Panzig B, Schroder G, Tietze K, Kramer A. Transmission of a multiresistant *Pseudomonas aeruginosa* strain at a German university hospital. *J Hosp Infect* **2001**;47:125–30.
- Bingen E, Bonacorsi S, Rohrlach P, et al. Molecular epidemiology provides evidence of genotypic heterogeneity of multidrug-resistant *Pseudomonas aeruginosa* serotype O:12 outbreak isolates from a pediatric hospital. *J Clin Microbiol* **1996**;34:3226–9.
- Harris A, Torres-Viera C, Venkataraman L, DeGirolami P, Samore M, Carmeli Y. Epidemiology and clinical outcomes of patients with multiresistant *Pseudomonas aeruginosa*. *Clin Infect Dis* **1999**;28:1128–33.
- Acar J, Carret G, Cavallo JD. Communiqué 1998 du Comité de l'Antibiogramme de la Société Française de Microbiologie. *Pathol Biol (Paris)* **1998**;46:1–16.
- Lucet JC, Decre D, Fichelle A, et al. Control of a prolonged outbreak of extended-spectrum  $\beta$ -lactamase-producing Enterobacteriaceae in a university hospital. *Clin Infect Dis* **1999**;29:1411–8.
- Le Gall JR, Lemeshow S, Saulnier F. A new Simplified Acute Physiology Score (SAPS II) based on a European/North American multicenter study. *JAMA* **1993**;270:2957–63.
- McCabe WR, Jackson GG. Gram-negative bacteremia II: etiology and ecology. *Ann Intern Med* **1962**;110:847–55.
- Knaus WA, Zimmerman JE, Wagner DP, Draper EA, Lawrence DE. APACHE-acute physiology and chronic health evaluation: a physiologically based classification system. *Crit Care Med* **1981**;9:591–7.
- Knaus WA, Draper EA, Wagner DP, Zimmerman JE. Prognosis in acute organ-system failure. *Ann Surg* **1985**;202:685–93.
- Hanberger H, Garcia-Rodriguez JA, Gobernado M, Goossens H, Nilsson LE, Struelens MJ. Antibiotic susceptibility among aerobic gram-negative bacilli in intensive care units in 5 European countries. French and Portuguese ICU Study Groups. *JAMA* **1999**;281:67–71.
- Arruda EA, Marinho IS, Boulos M, et al. Nosocomial infections caused by multiresistant *Pseudomonas aeruginosa*. *Infect Control Hosp Epidemiol* **1999**;20:620–3.

31. Landman D, Quale JM, Mayorga D, et al. Citywide clonal outbreak of multiresistant *Acinetobacter baumannii* and *Pseudomonas aeruginosa* in Brooklyn, NY: the preantibiotic era has returned. *Arch Intern Med* **2002**; 162:1515–20.
32. Cailleaux V, Mulin B, Capellier G, Julliot MC, Thouverez M, Talon D. Epidemiological study of variations in beta-lactam antibiotic susceptibility of *Pseudomonas aeruginosa* in two intensive care units. *J Hosp Infect* **1997**; 37:217–24.
33. Harris AD, Karchmer TB, Carmeli Y, Samore MH. Methodological principles of case-control studies that analyzed risk factors for antibiotic resistance: a systematic review. *Clin Infect Dis* **2001**; 32:1055–61.
34. Harris AD, Samore MH, Lipsitch M, Kaye KS, Perencevich E, Carmeli Y. Control-group selection importance in studies of antimicrobial resistance: examples applied to *Pseudomonas aeruginosa*, *Enterococci*, and *Escherichia coli*. *Clin Infect Dis* **2002**; 34:1558–63.
35. Lucet JC, Chevret S, Decre D, et al. Outbreak of multiply resistant Enterobacteriaceae in an intensive care unit: epidemiology and risk factors for acquisition. *Clin Infect Dis* **1996**; 22:430–6.
36. Carmeli Y, Eliopoulos GM, Samore MH. Antecedent treatment with different antibiotic agents as a risk factor for vancomycin-resistant enterococcus. *Emerg Infect Dis* **2002**; 8:802–7.
37. Trouillet JL, Vuagnat A, Combes A, Kassis N, Chastre J, Gibert C. *Pseudomonas aeruginosa* ventilator-associated pneumonia: comparison of episodes due to piperacillin-resistant versus piperacillin-susceptible organisms. *Clin Infect Dis* **2002**; 34:1047–54.
